# Supplementary material for: Pervasive Inter-Individual Variation in Allele-Specific Expression in Monozygotic Twins
Source: Front Genet. 2019 Nov 26;10:1178. doi: 10.3389/fgene.2019.01178 (PMC6887657; doi:10.3389/fgene.2019.01178)
Supplement: Dataset S2 — BioProjects and RNA-Seq experiments used in this study. [file Table_6.xlsx]

## Sheet: INDEX
Sheet Index
README
Dataset S2

## Sheet: README
Pervasive Inter-individual Variation in Allele-Specific Expression in Monozygotic Twins Ronaldo da Silva Francisco Junior;1,#,&,* Cristina dos Santos Ferreira;2,# Juan Carlo Santos e Silva;2 Douglas Terra Machado;2 Yasmmin Martins Cortes;1 Victor Ramos;3,¥ Gustavo Simões Carnivali;4 Ana Beatriz Garcia;2 Enrique Medina-Acosta2,** 1 Laboratório Nacional de Computação Científica, Petrópolis, RJ, Bra…
Dataset S2. BioProjects and RNA-Seq experiments used in this study.

## Sheet: Dataset S2
Assay_Type	AvgSpotLen	BioProject	BioSample	Experiment	Instrument	LibraryLayout	LibrarySelection	LibrarySource	Library_Name	LoadDate	MBases	MBytes	Organism	ReleaseDate	Run	SRA_Sample	SRA_Study	Sample_Name	Karyotypic status	disease_status	cell_type/tissue	Age	kin relation	sex	Coriell cell repository sample ID	Center_Name	Consent	DATASTORE_filetype	InsertSize	DATASTORE_provider	Platform	1000Genomes family	protocol
RNA-Seq	190	PRJNA239814	SAMN02671025	SRX480649	Illumina HiSeq 2000	PAIRED	cDNA	TRANSCRIPTOMIC	.	2014-03-03	28542	17262	Homo sapiens	2014-04-08	SRR1182244	SRS565505	SRP039348	GSM1338311	Heterokaryotypic	Trisomy 21	twin 1_T21_fetal primary fibroblasts	fetal	proband	female	.	GEO	public	sra	0	NCBI	ILLUMINA	.	.
RNA-Seq	200	PRJNA239814	SAMN02671026	SRX480651	Illumina HiSeq 2000	PAIRED	cDNA	TRANSCRIPTOMIC	.	2015-12-10	10270	5801	Homo sapiens	2015-07-22	SRR1182246	SRS565507	SRP039348	GSM1338313	Heterokaryotypic	Trisomy 21	twin 1_T21_fetal primary fibroblasts	fetal	proband	female	.	GEO	public	sra	0	NCBI	ILLUMINA	.	.
RNA-Seq	200	PRJNA239814	SAMN02671033	SRX480653	Illumina HiSeq 2500	PAIRED	cDNA	TRANSCRIPTOMIC	.	2014-03-03	2926	1679	Homo sapiens	2014-04-08	SRR1182249	SRS565509	SRP039348	GSM1338315	Heterokaryotypic	Trisomy 21	twin 1_T21_fetal primary fibroblasts	fetal	proband	female	.	GEO	public	sra	0	NCBI	ILLUMINA	.	.
RNA-Seq	200	PRJNA239814	SAMN02671033	SRX480653	Illumina HiSeq 2500	PAIRED	cDNA	TRANSCRIPTOMIC	.	2014-03-03	3119	1816	Homo sapiens	2014-04-08	SRR1182248	SRS565509	SRP039348	GSM1338315	Heterokaryotypic	Trisomy 21	twin 1_T21_fetal primary fibroblasts	fetal	proband	female	.	GEO	public	sra	0	NCBI	ILLUMINA	.	.
RNA-Seq	200	PRJNA239814	SAMN02671031	SRX480655	Illumina HiSeq 2500	PAIRED	cDNA	TRANSCRIPTOMIC	.	2014-03-03	4072	2368	Homo sapiens	2014-04-08	SRR1182252	SRS565512	SRP039348	GSM1338317	Heterokaryotypic	Trisomy 21	twin 1_T21_fetal primary fibroblasts	fetal	proband	female	.	GEO	public	sra	0	NCBI	ILLUMINA	.	.
RNA-Seq	200	PRJNA239814	SAMN02671031	SRX480655	Illumina HiSeq 2500	PAIRED	cDNA	TRANSCRIPTOMIC	.	2014-03-03	3829	2195	Homo sapiens	2014-04-08	SRR1182253	SRS565512	SRP039348	GSM1338317	Heterokaryotypic	Trisomy 21	twin 1_T21_fetal primary fibroblasts	fetal	proband	female	.	GEO	public	sra	0	NCBI	ILLUMINA	.	.
RNA-Seq	190	PRJNA239814	SAMN02671027	SRX480650	Illumina HiSeq 2000	PAIRED	cDNA	TRANSCRIPTOMIC	.	2014-03-03	27606	16593	Homo sapiens	2014-04-08	SRR1182245	SRS565506	SRP039348	GSM1338312	Homokaryotypic	Euploid (normal control)	twin 2_euploid_fetal primary fibroblasts	fetal	twin sister	female	.	GEO	public	sra	0	NCBI	ILLUMINA	.	.
RNA-Seq	200	PRJNA239814	SAMN02671032	SRX480652	Illumina HiSeq 2000	PAIRED	cDNA	TRANSCRIPTOMIC	.	2015-12-10	11027	6202	Homo sapiens	2015-07-22	SRR1182247	SRS565508	SRP039348	GSM1338314	Homokaryotypic	Euploid (normal control)	twin 2_euploid_fetal primary fibroblasts	fetal	twin sister	female	.	GEO	public	sra	0	NCBI	ILLUMINA	.	.
RNA-Seq	200	PRJNA239814	SAMN02671029	SRX480654	Illumina HiSeq 2500	PAIRED	cDNA	TRANSCRIPTOMIC	.	2014-03-03	5050	2947	Homo sapiens	2014-04-08	SRR1182250	SRS565510	SRP039348	GSM1338316	Homokaryotypic	Euploid (normal control)	twin 2_euploid_fetal primary fibroblasts	fetal	twin sister	female	.	GEO	public	sra	0	NCBI	ILLUMINA	.	.
RNA-Seq	200	PRJNA239814	SAMN02671029	SRX480654	Illumina HiSeq 2500	PAIRED	cDNA	TRANSCRIPTOMIC	.	2014-03-03	4798	2758	Homo sapiens	2014-04-08	SRR1182251	SRS565510	SRP039348	GSM1338316	Homokaryotypic	Euploid (normal control)	twin 2_euploid_fetal primary fibroblasts	fetal	twin sister	female	.	GEO	public	sra	0	NCBI	ILLUMINA	.	.
RNA-Seq	200	PRJNA239814	SAMN02671040	SRX480656	Illumina HiSeq 2500	PAIRED	cDNA	TRANSCRIPTOMIC	.	2014-03-03	3744	2194	Homo sapiens	2014-04-08	SRR1182254	SRS565511	SRP039348	GSM1338318	Homokaryotypic	Euploid (normal control)	twin 2_euploid_fetal primary fibroblasts	fetal	twin sister	female	.	GEO	public	sra	0	NCBI	ILLUMINA	.	.
RNA-Seq	200	PRJNA239814	SAMN02671040	SRX480656	Illumina HiSeq 2500	PAIRED	cDNA	TRANSCRIPTOMIC	.	2014-03-03	3530	2040	Homo sapiens	2014-04-08	SRR1182255	SRS565511	SRP039348	GSM1338318	Homokaryotypic	Euploid (normal control)	twin 2_euploid_fetal primary fibroblasts	fetal	twin sister	female	.	GEO	public	sra	0	NCBI	ILLUMINA	.	.
RNA-Seq	190	PRJNA227902	SAMN02401083	SRX375777	Illumina HiSeq 2000	PAIRED	cDNA	TRANSCRIPTOMIC	.	2013-11-12	12895	7384	Homo sapiens	2013-12-02	SRR1028343	SRS501455	SRP032928	GSM1261902	Homokaryotypic	Euploid (normal control)	Twin_euploid_induced pluripotent stem cells (iPSC)	fetal_iPSC	twin sister	female	.	GEO	public	sra	0	NCBI	ILLUMINA	.	.
RNA-Seq	190	PRJNA227902	SAMN02401086	SRX375778	Illumina HiSeq 2000	PAIRED	cDNA	TRANSCRIPTOMIC	.	2013-11-12	10516	6004	Homo sapiens	2013-12-02	SRR1028344	SRS501457	SRP032928	GSM1261903	Homokaryotypic	Euploid (normal control)	Twin_euploid_induced pluripotent stem cells (iPSC)	fetal_iPSC	twin sister	female	.	GEO	public	sra	0	NCBI	ILLUMINA	.	.
RNA-Seq	196	PRJNA227902	SAMN02401085	SRX375779	Illumina HiSeq 2000	PAIRED	cDNA	TRANSCRIPTOMIC	.	2013-11-12	20927	13528	Homo sapiens	2013-12-02	SRR1028345	SRS501458	SRP032928	GSM1261904	Homokaryotypic	Euploid (normal control)	Twin_euploid_induced pluripotent stem cells (iPSC)	fetal_iPSC	twin sister	female	.	GEO	public	sra	0	NCBI	ILLUMINA	.	.
RNA-Seq	196	PRJNA227902	SAMN02401089	SRX375780	Illumina HiSeq 2000	PAIRED	cDNA	TRANSCRIPTOMIC	.	2013-11-12	23229	14617	Homo sapiens	2013-12-02	SRR1028346	SRS501460	SRP032928	GSM1261905	Homokaryotypic	Euploid (normal control)	Twin_euploid_induced pluripotent stem cells (iPSC)	fetal_iPSC	twin sister	female	.	GEO	public	sra	0	NCBI	ILLUMINA	.	.
RNA-Seq	190	PRJNA227902	SAMN02401081	SRX375781	Illumina HiSeq 2000	PAIRED	cDNA	TRANSCRIPTOMIC	.	2013-11-12	10796	6202	Homo sapiens	2013-12-02	SRR1028347	SRS501459	SRP032928	GSM1261906	Heterokaryotypic	Trisomy 21	Twin_Trisomy 21_induced pluripotent stem cells (iPSC)	fetal_iPSC	proband	female	.	GEO	public	sra	0	NCBI	ILLUMINA	.	.
RNA-Seq	196	PRJNA227902	SAMN02401088	SRX375782	Illumina HiSeq 2000	PAIRED	cDNA	TRANSCRIPTOMIC	.	2013-11-12	21698	13998	Homo sapiens	2013-12-02	SRR1028348	SRS501461	SRP032928	GSM1261907	Heterokaryotypic	Trisomy 21	Twin_Trisomy 21_induced pluripotent stem cells (iPSC)	fetal_iPSC	proband	female	.	GEO	public	sra	0	NCBI	ILLUMINA	.	.
RNA-Seq	196	PRJNA227902	SAMN02401078	SRX375783	Illumina HiSeq 2000	PAIRED	cDNA	TRANSCRIPTOMIC	.	2013-11-12	16554	10464	Homo sapiens	2013-12-02	SRR1028349	SRS501462	SRP032928	GSM1261908	Heterokaryotypic	Trisomy 21	Twin_Trisomy 21_induced pluripotent stem cells (iPSC)	fetal_iPSC	proband	female	.	GEO	public	sra	0	NCBI	ILLUMINA	.	.
RNA-Seq	100	PRJNA170210	SAMN01086613	SRX158851	Illumina HiSeq 2000	SINGLE	cDNA	TRANSCRIPTOMIC	GSM957397: TwinSet_GM14381	2012-07-09	8445	5584	Homo sapiens	2017-07-03	SRR519874	SRS349309	SRP014174	GSM957397	Homokaryptypic	Euploid (normal control)	cultured B-cells	20-year-old	proband	female	GM14381	GEO	public	sra	0	NCBI	ILLUMINA	1700	non-directional
RNA-Seq	100	PRJNA170210	SAMN01086614	SRX158852	Illumina HiSeq 2000	SINGLE	cDNA	TRANSCRIPTOMIC	GSM957398: TwinSet_GM14382	2012-07-09	9298	6205	Homo sapiens	2017-07-03	SRR519875	SRS349310	SRP014174	GSM957398	Homokaryotypic	Euploid (normal control)	cultured B-cells	20-year-old	twin sister	female	GM14382	GEO	public	sra	0	NCBI	ILLUMINA	1700	non-directional
RNA-Seq	100	PRJNA170210	SAMN01086615	SRX158853	Illumina HiSeq 2000	SINGLE	cDNA	TRANSCRIPTOMIC	GSM957399: TwinSet_GM14408	2012-07-09	18228	12751	Homo sapiens	2017-07-03	SRR519876	SRS349311	SRP014174	GSM957399	Homokaryotypic	Euploid (normal control)	cultured B-cells	58-year-old	proband	male	GM14408	GEO	public	sra	0	NCBI	ILLUMINA	1705	non-directional
RNA-Seq	100	PRJNA170210	SAMN01086616	SRX158854	Illumina HiSeq 2000	SINGLE	cDNA	TRANSCRIPTOMIC	GSM957400: TwinSet_GM14409	2012-07-09	18456	13259	Homo sapiens	2017-07-03	SRR519877	SRS349312	SRP014174	GSM957400	Homokaryotypic	Euploid (normal control)	cultured B-cells	58-year-old	twin brother	male	GM14409	GEO	public	sra	0	NCBI	ILLUMINA	1705	non-directional
RNA-Seq	100	PRJNA170210	SAMN01086617	SRX158855	Illumina HiSeq 2000	SINGLE	cDNA	TRANSCRIPTOMIC	GSM957401: TwinSet_GM14432	2012-07-09	9547	6308	Homo sapiens	2017-07-03	SRR519878	SRS349313	SRP014174	GSM957401	Homokaryotypic	Euploid (normal control)	cultured B-cells	47-year-old	proband	female	GM14432	GEO	public	sra	0	NCBI	ILLUMINA	1710	non-directional
RNA-Seq	100	PRJNA170210	SAMN01086618	SRX158856	Illumina HiSeq 2000	SINGLE	cDNA	TRANSCRIPTOMIC	GSM957402: TwinSet_GM14433	2012-07-09	10500	7023	Homo sapiens	2017-07-03	SRR519879	SRS349314	SRP014174	GSM957402	Homokaryotypic	Euploid (normal control)	cultured B-cells	47-year-old	twin sister	female	GM14433	GEO	public	sra	0	NCBI	ILLUMINA	1710	non-directional
RNA-Seq	100	PRJNA170210	SAMN01086619	SRX158857	Illumina HiSeq 2000	SINGLE	cDNA	TRANSCRIPTOMIC	GSM957403: TwinSet_GM14447	2012-07-09	8529	5589	Homo sapiens	2017-07-03	SRR519880	SRS349315	SRP014174	GSM957403	Homokaryotypic	Euploid (normal control)	cultured B-cells	65-year-old	proband	female	GM14447	GEO	public	sra	0	NCBI	ILLUMINA	1715	non-directional
RNA-Seq	100	PRJNA170210	SAMN01086620	SRX158858	Illumina HiSeq 2000	SINGLE	cDNA	TRANSCRIPTOMIC	GSM957404: TwinSet_GM14448	2012-07-09	9104	6068	Homo sapiens	2017-07-03	SRR519881	SRS349316	SRP014174	GSM957404	Homokaryotypic	Euploid (normal control)	cultured B-cells	65-year-old	twin sister	female	GM14448	GEO	public	sra	0	NCBI	ILLUMINA	1715	non-directional
RNA-Seq	100	PRJNA170210	SAMN01086621	SRX158859	Illumina HiSeq 2000	SINGLE	cDNA	TRANSCRIPTOMIC	GSM957405: TwinSet_GM14452	2012-07-09	10316	6849	Homo sapiens	2017-07-03	SRR519882	SRS349317	SRP014174	GSM957405	Homokaryotypic	Euploid (normal control)	cultured B-cells	46-year-old	proband	female	GM14452	GEO	public	sra	0	NCBI	ILLUMINA	1716	non-directional
RNA-Seq	100	PRJNA170210	SAMN01086622	SRX158860	Illumina HiSeq 2000	SINGLE	cDNA	TRANSCRIPTOMIC	GSM957406: TwinSet_GM14453	2012-07-09	11648	7885	Homo sapiens	2017-07-03	SRR519883	SRS349318	SRP014174	GSM957406	Homokaryotypic	Euploid (normal control)	cultured B-cells	46-year-old	twin sister	female	GM14453	GEO	public	sra	0	NCBI	ILLUMINA	1716	non-directional
RNA-Seq	100	PRJNA170210	SAMN01086623	SRX158861	Illumina HiSeq 2000	SINGLE	cDNA	TRANSCRIPTOMIC	GSM957407: TwinSet_GM14467	2012-07-09	10803	7269	Homo sapiens	2017-07-03	SRR519884	SRS349319	SRP014174	GSM957407	Homokaryotypic	Euploid (normal control)	cultured B-cells	19-year-old	proband	female	GM14467	GEO	public	sra	0	NCBI	ILLUMINA	1721	non-directional
RNA-Seq	100	PRJNA170210	SAMN01086624	SRX158862	Illumina HiSeq 2000	SINGLE	cDNA	TRANSCRIPTOMIC	GSM957408: TwinSet_GM14468	2012-07-09	12521	8563	Homo sapiens	2017-07-03	SRR519885	SRS349320	SRP014174	GSM957408	Homokaryotypic	Euploid (normal control)	cultured B-cells	19-year-old	twin sister	female	GM14468	GEO	public	sra	0	NCBI	ILLUMINA	1721	non-directional
RNA-Seq	100	PRJNA170210	SAMN01086625	SRX158863	Illumina HiSeq 2000	SINGLE	cDNA	TRANSCRIPTOMIC	GSM957409: TwinSet_GM14506	2012-07-09	9666	6437	Homo sapiens	2017-07-03	SRR519886	SRS349321	SRP014174	GSM957409	Homokaryotypic	Euploid (normal control)	cultured B-cells	26-year-old	proband	female	GM14506	GEO	public	sra	0	NCBI	ILLUMINA	1735	non-directional
RNA-Seq	100	PRJNA170210	SAMN01086626	SRX158864	Illumina HiSeq 2000	SINGLE	cDNA	TRANSCRIPTOMIC	GSM957410: TwinSet_GM14507	2012-07-09	10084	6736	Homo sapiens	2017-07-03	SRR519887	SRS349322	SRP014174	GSM957410	Homokaryotypic	Euploid (normal control)	cultured B-cells	26-year-old	twin sister	female	GM14507	GEO	public	sra	0	NCBI	ILLUMINA	1735	non-directional
RNA-Seq	100	PRJNA170210	SAMN01086627	SRX158865	Illumina HiSeq 2000	SINGLE	cDNA	TRANSCRIPTOMIC	GSM957411: TwinSet_GM14520	2012-07-09	10154	6775	Homo sapiens	2017-07-03	SRR519888	SRS349323	SRP014174	GSM957411	Homokaryotypic	Euploid (normal control)	cultured B-cells	22-year-old	proband	female	GM14520	GEO	public	sra	0	NCBI	ILLUMINA	1740	non-directional
RNA-Seq	100	PRJNA170210	SAMN01086628	SRX158866	Illumina HiSeq 2000	SINGLE	cDNA	TRANSCRIPTOMIC	GSM957412: TwinSet_GM14521	2012-07-09	11595	7802	Homo sapiens	2017-07-03	SRR519889	SRS349324	SRP014174	GSM957412	Homokaryotypic	Euploid (normal control)	cultured B-cells	22-year-old	twin sister	female	GM14521	GEO	public	sra	0	NCBI	ILLUMINA	1740	non-directional
RNA-Seq	100	PRJNA170210	SAMN01086629	SRX158867	Illumina HiSeq 2000	SINGLE	cDNA	TRANSCRIPTOMIC	GSM957413: TwinSet_GM14568	2012-07-09	10538	6991	Homo sapiens	2017-07-03	SRR519890	SRS349325	SRP014174	GSM957413	Homokaryotypic	Euploid (normal control)	cultured B-cells	24-year-old	proband	male	GM14568	GEO	public	sra	0	NCBI	ILLUMINA	1752	non-directional
RNA-Seq	100	PRJNA170210	SAMN01086630	SRX158868	Illumina HiSeq 2000	SINGLE	cDNA	TRANSCRIPTOMIC	GSM957414: TwinSet_GM14569	2012-07-09	11788	7887	Homo sapiens	2017-07-03	SRR519891	SRS349326	SRP014174	GSM957414	Homokaryotypic	Euploid (normal control)	cultured B-cells	24-year-old	twin brother	male	GM14569	GEO	public	sra	0	NCBI	ILLUMINA	1752	non-directional
RNA-Seq	295	PRJNA316578	SAMN04858234	SRX1706433	Illumina HiSeq 3000	PAIRED	cDNA	TRANSCRIPTOMIC	.	2016-04-16	7376	3109	Homo sapiens	2017-06-30	SRR3390461	SRS1398306	SRP073347	LKZ-CON-015	normal	health	PBMC/whole blood	36-year-old	unrelated	female	.	GUANGZHOU INSTITUTE OF RESPIRATORY DISEASE, FIRST	public	sra	0	ncbi	ILLUMINA	.	.
RNA-Seq	295	PRJNA316578	SAMN04858235	SRX1706435	Illumina HiSeq 3000	PAIRED	cDNA	TRANSCRIPTOMIC	.	2016-04-16	7807	3338	Homo sapiens	2017-06-30	SRR3390473	SRS1398307	SRP073347	LKZ-CON-016	normal	health	PBMC/whole blood	40-year-old	unrelated	female	.	GUANGZHOU INSTITUTE OF RESPIRATORY DISEASE, FIRST	public	sra	0	ncbi	ILLUMINA	.	.
RNA-Seq	295	PRJNA316578	SAMN04858232	SRX1706431	Illumina HiSeq 3000	PAIRED	cDNA	TRANSCRIPTOMIC	.	2016-04-15	9297	3893	Homo sapiens	2017-06-30	SRR3389246	SRS1398304	SRP073347	LKZ-CON-013	normal	health	PBMC/whole blood	29-year-old	unrelated	male	.	GUANGZHOU INSTITUTE OF RESPIRATORY DISEASE, FIRST	public	sra	0	ncbi	ILLUMINA	.	.
RNA-Seq	292	PRJNA316578	SAMN04858233	SRX1706432	Illumina HiSeq 3000	PAIRED	cDNA	TRANSCRIPTOMIC	.	2016-04-15	9015	3776	Homo sapiens	2017-06-30	SRR3390437	SRS1398305	SRP073347	LKZ-CON-014	normal	health	PBMC/whole blood	30-year-old	unrelated	male	.	GUANGZHOU INSTITUTE OF RESPIRATORY DISEASE, FIRST	public	sra	0	ncbi	ILLUMINA	.	.
