# Supplementary material for: Pervasive Inter-Individual Variation in Allele-Specific Expression in Monozygotic Twins
Source: Front Genet. 2019 Nov 26;10:1178. doi: 10.3389/fgene.2019.01178 (PMC6887657; doi:10.3389/fgene.2019.01178)
Supplement: Dataset S16 — Summary of A-to-I(G) RNA-editing sites resulting in synonymous and non-synonymous substitutions in the ten twin pairs set. [file Table_14.xlsx]

## Sheet: INDEX
Sheet Index
README
Header Descriptors
Editing effect analyze for MZT1
Editing effect analyze for MZT2
Editing effect analyze for MZT3
Editing effect analyze for MZT4
Editing effect analyze for MZT5
Editing effect analyze for MZT6
Editing effect analyze for MZT7
Editing effect analyze for MZT8
Editing effect analyze for MZT9
Editing effectanalyze for MZT10

## Sheet: README
Pervasive Inter-individual Variation in Allele-Specific Expression in Monozygotic Twins Ronaldo da Silva Francisco Junior;1,#,&,* Cristina dos Santos Ferreira;2,# Juan Carlo Santos e Silva;2 Douglas Terra Machado;2 Yasmmin Martins Cortes;1 Victor Ramos;3,¥ Gustavo Simões Carnivali;4 Ana Beatriz Garcia;2 Enrique Medina-Acosta2,** 1 Laboratório Nacional de Computação Científica, Petrópolis, RJ, Bra…
Dataset S16. Summary of A-to-I(G) RNA-editing sites resulting in synonymous and non-synonymous substitutions in the ten twin pairs set.

## Sheet: Header Descriptors
Header	Description
Canonical_RNA_Editing_Positions	Filter-selected RADAR positions by the following criteria: only A/G variants not intersected with simple repeats; uniqueness in the reference human genome (hg38) using ShortMatch queries with flanking sequences (25 bases at left and right boundaries) of each variant to exclude miscalling due to duplications.
Gene_consensus	name of all transcripts (GRCh38.92) in which the SNV is annotated
Effect	Synonymous or non-synonymous mutations (provided by RADAR)
Type	Type of amino acid substitution (also provided by RADAR)

## Sheet: Editing effect analyze for MZT1
Canonical_RNA_Editing_Positions	Gene_consensus	Effect	Type
chr10_94607911	HELLS/AL138759.1	Synonymous	Leu->Leu
chr10_94607913	HELLS/AL138759.1	Non-synonymous	Glu->Gly
chr10_94607917	HELLS/AL138759.1	Synonymous	Thr->Thr
chr10_94607959	HELLS/AL138759.1	Synonymous	Ser->Ser
chr12_27030182	MED21	Non-synonymous	Glu->Gly
chr12_27030183	MED21	Synonymous	Glu->Glu
chr12_49324229	TROAP/AC125611.4	Non-synonymous	Arg->Gly
chr13_45516236	COG3	Non-synonymous	Ile->Val
chr15_75353745	NEIL1	Non-synonymous	Lys->Arg
chr19_21119176	ZNF714	Non-synonymous	Arg->Gly
chr7_39950928	CDK13	Non-synonymous	Lys->Arg
chr7_39950949	CDK13	Non-synonymous	Gln->Arg
chr7_56079014	SUMF2	Non-synonymous	Gln->Arg

## Sheet: Editing effect analyze for MZT2
Canonical_RNA_Editing_Positions	Gene_consensus	Effect	Type
chr10_94607911	HELLS/AL138759.1	Synonymous	Leu->Leu
chr10_94607959	HELLS/AL138759.1	Synonymous	Ser->Ser
chr12_27030182	MED21	Non-synonymous	Glu->Gly
chr12_27030183	MED21	Synonymous	Glu->Glu
chr12_27030182	MED21	Non-synonymous	Gln->Arg
chr12_122981715	AC026362.1/ARL6IP4	Non-synonymous	Lys->Arg
chr13_45516236	COG3	Non-synonymous	Ile->Val
chr15_75353745	NEIL1	Non-synonymous	Lys->Arg

## Sheet: Editing effect analyze for MZT3
Canonical_RNA_Editing_Positions	Gene_consensus	Effect	Type
chr1_26447733	DHDDS	Synonymous	Val->Val
chr1_26447734	DHDDS	Non-synonymous	Ile->Val
chr10_94607911	HELLS/AL138759.1	Synonymous	Leu->Leu
chr10_94607917	HELLS/AL138759.1	Synonymous	Thr->Thr
chr12_27030182	HELLS/AL138759.1	Synonymous	Ser->Ser
chr12_27030183	MED21	Synonymous	Glu->Glu
chr12_131932049	PUS1	Non-synonymous	Thr->Ala
chr19_21119176	ZNF714	Non-synonymous	Arg->Gly
chr7_39950949	CDK13	Non-synonymous	Gln->Arg
chr7_56079014	SUMF2	Non-synonymous	Gln->Arg

## Sheet: Editing effect analyze for MZT4
Canonical_RNA_Editing_Positions	Gene_consensus	Effect	Type
chr10_94607911	HELLS/AL138759.1	Synonymous	Leu->Leu
chr10_94607917	HELLS/AL138759.1	Synonymous	Thr->Thr
chr10_94607959	HELLS/AL138759.1	Synonymous	Ser->Ser
chr12_27030177	MED21	Synonymous	Gln->Gln
chr12_27030182	MED21	Non-synonymous	Glu->Gly
chr12_27030183	MED21	Synonymous	Glu->Glu
chr12_27030188	MED21	Non-synonymous	Gln->Arg
chr13_45516236	COG3	Non-synonymous	Ile->Val
chr7_56079014	SUMF2	Non-synonymous	Gln->Arg
chrX_47209406	UBA1	Synonymous	Leu->Leu

## Sheet: Editing effect analyze for MZT5
Canonical_RNA_Editing_Positions	Gene_consensus	Effect	Type
chr10_94607911	HELLS/AL138759.1	Synonymous	Leu->Leu
chr10_94607917	HELLS/AL138759.1	Synonymous	Thr->Thr
chr10_94607959	HELLS/AL138759.1	Synonymous	Ser->Ser
chr12_27030182	MED21	Non-synonymous	Glu->Gly
chr12_27030182	MED21	Synonymous	Glu->Glu

## Sheet: Editing effect analyze for MZT6
Canonical_RNA_Editing_Positions	Gene_consensus	Effect	Type
chr10_94607911	HELLS/AL138759.1	Synonymous	Leu->Leu
chr10_94607917	HELLS/AL138759.1	Synonymous	Thr->Thr
chr13_45516236	COG3	Non-synonymous	Ile->Val
chr15_75353745	NEIL1	Non-synonymous	Lys->Arg
chr12_27030182	SUMF2	Non-synonymous	Gln->Arg

## Sheet: Editing effect analyze for MZT7
Canonical_RNA_Editing_Positions	Gene_consensus	Effect	Type
chr10_94607911	HELLS/AL138759.1	Synonymous	Leu->Leu
chr10_94607917	HELLS/AL138759.1	Synonymous	Thr->Thr
chr10_94607959	HELLS/AL138759.1	Synonymous	Ser->Ser
chr12_27030182	MED21	Non-synonymous	Glu->Gly
chr12_27030182	MED21	Synonymous	Glu->Glu
chr12_27030188	MED21	Non-synonymous	Gln->Arg
chr15_75353745	NEIL1	Non-synonymous	Lys->Arg
chr7_39950949	CDK13	Non-synonymous	Gln->Arg

[truncated: 3 more sheets: Editing effect analyze for MZT8, Editing effect analyze for MZT9, Editing effectanalyze for MZT10]
