# Supplementary material for: Pervasive Inter-Individual Variation in Allele-Specific Expression in Monozygotic Twins
Source: Front Genet. 2019 Nov 26;10:1178. doi: 10.3389/fgene.2019.01178 (PMC6887657; doi:10.3389/fgene.2019.01178)
Supplement: Table S1 — Review of cases of heterokaryotypic co-twins reported in the literature. [file Table_1.xlsx]

## Sheet: INDEX
Sheet Index
README
Table S1

## Sheet: README
Pervasive Inter-individual Variation in Allele-Specific Expression in Monozygotic Twins Ronaldo da Silva Francisco Junior;1,#,&,* Cristina dos Santos Ferreira;2,# Juan Carlo Santos e Silva;2 Douglas Terra Machado;2 Yasmmin Martins Cortes;1 Victor Ramos;3,¥ Gustavo Simões Carnivali;4 Ana Beatriz Garcia;2 Enrique Medina-Acosta2,** 1 Laboratório Nacional de Computação Científica, Petrópolis, RJ, Bra…
Table S1. Review of cases of heterokaryotypic co-twins reported in the literature.

## Sheet: Table S1
Table S1. Review of cases of heterokaryotypic co-twins reported in the literature.
Reference	Twin	Age	Sex	Sample – karyotype – chromosome constitution	Monozygosity test	Pregnancy / Mother age	Phenotype
(Scott and Ferguson–Smith, 1973)	T1	26 weeks	Male	Lymphocytes – 46, XY	NA	Spontaneous / 25-year-old	920 g, premature, slightly edematous. Died 2 and ½ hours after delivery.
				Fibroblast culture – 46, XY
	T2	26 weeks	Male	Lymphocytes – 46, XY			1020 g Delivered as a breech and was a typical acardiac monster.
				Fibroblast culture – 47, XY+21
(Neilson et al., 1982a)	T1	19 weeks	Female	45,X0 – aneuploid	NA	NA / 26-year-old	Turner syndrome, pregnancy terminated
	T2	19 weeks	Female	46,XX – euploid			Fetus was dead at 15 weeks
(Neilson et al., 1982b)	T1	19 weeks	Female	46 XX – euploid	NA	Spontaneous / 30-year-old	Fetus 1 died at 15 weeks, still visible in ultrasound at 19 weeks
	T2	19 weeks	Female	Tensor fasciae latae muscle – 45,X aneuploid			Fetus 2 alive at 19 weeks with large cystic structure. Pregnancy was terminated
(Rogers et al., 1982)	T1	35 weeks	Male	Sample – Age / % Trisomy 21 cells	Placentation, blood type, 6 antigenic systems, HLA typing	Spontaneous / 24-year-old	Down syndrome
				Peripheral blood – Birth / 14
				Peripheral blood – 13 days / 11
				Peripheral blood – 15 days / 15
				Peripheral blood – 22 days / 22
				Peripheral blood – 85 days / 16
				Skin fibroblasts – 7 days / 100
				Skin fibroblasts – 21 days / 100
	T2	35 weeks	Male	Sample – Age / % Trisomy 21 cells	Placentation, blood type, 6 antigenic systems, HLA typing		Normal
				Peripheral blood – Birth / 17
				Peripheral blood – 13 days / 19
				Peripheral blood – 15 days / 19
				Peripheral blood – 22 days / 26
				Peripheral blood – 85 days / 20
				Skin fibroblasts – 7 days / 0
				Skin fibroblasts – 21 days / 0
(Watson et al., 1990)	T1	30 weeks	Male	Pericardial tissue 46, XY, X, -Y,+der(Y) t(Y;1)(q12;q21), some cells had the translocation Y;1.	No molecular data; only definition of a placenta monochorionic; diamniotic membranes with multiple vascular anastomoses.	Spontaneous / 25-year-old	Many anomalies, died after 30 minutes of birth
				Partially trisomic for most of the long arm of chromosome 1, from 1q21 to 1qter.
	T2	30 weeks	Male	Peripheral lymphocyte – 46, XY euploid			Anemic with moderate respiratory distress, at 6 months he is thriving and has no sequelae
				No other tissues were studied
(Lespinasse et al., 1998)	T1	14-year-old	Female	At 14 years: Karyotype normal for blood sample – 46,XX euploid	6 minisatellite probes and 1 probe for X-chromosome	Spontaneous / 28-year-old	Growth retardation with features of Turner syndrome, lacking pubertal development. High correlation between phenotype and the level of chromosomal mosaicism
		19-year-old		At 19 years:
				Blood 45,X (6%) / 46,XX (94%) – aneuploid mosaic
				Skin 45,X (99%) / 46, XX (1%) – aneuploid mosaic
	T2	19-year-old	Female	Blood 45,X (5%) / 46,XX (95%) – aneuploid mosaic			Normal with very mild TS, normal puberty at 13.2 and further spanniomennorhea
				Skin 45,X (37.4%) / 46, XX (62.6%) – aneuploid mosaic
	T3	19-year-old	Female	Blood 45,X (7%) / 46,XX (93%) – aneuploid mosaic			Normal puberty at 13.2 and normal menstrual cycles
				Skin 45,X (3%) / 46, XX (97%) – aneuploid mosaic
(Sepulveda et al., 1998)	T1	At birth and 37 weeks	Male	Peripheral blood – 46, XY(88%)/47, XY+14 (12%) – mosaicism	NA	NA / 38-year-old	Tetralogy of Fallot died, at 36 days after birth
	T2	At birth and 37 weeks	Male	Not analyzed			Normal
(Nieuwint et al., 1999)	T1	14 weeks	Male	Amniotic fluid – 46,XY– euploid	10 STR	NA / 38-year-old	At 24 weeks of gestation the fetus died (Normal)
				Chorionic villi – 46,XY – euploid
	T2	14 weeks	Male	Amniotic fluid – 47,XY,+21 – trisomy 21			Trisomy 21 pregnancy terminated
		16 weeks		Chorionic villi – 46,XY – euploid
		24 weeks		Cord blood from live fetus – 47,XY+21 (1,2%)/46,XY (98,8%)
	T1	18 weeks	Male	Amniotic fluid – 45,X(8%)/46,XY(92%) – aneuploid mosaic	11 STR	NA / 30-year-old	Pregnancy terminated at 23 weeks (Turner syndrome)
				Heart blood – 45,X(3,3%)/46,XY(96,7%) – aneuploid mosaic
				Skin – 46,XY – euploid
	T2	18 weeks	Female	Amniotic fluid – 45,X –aneuploid
				Skin – 45,X aneuploid
(Schmid et al., 2000)	T1	17 weeks and at delivery with 26 weeks	Female	Sample – 45,X / 46,X,i(Yp) / 46,XX (%)	Based on thin separating membrane, positive T–sign. Macroscopic placenta analysis confirmed monochorionic and diamniotic twin pregnancy. No molecular markers used. Probes for detection of X and Y chromosomes and FISH analysis for karyotyping.	Spontaneous / NA	IUFD diagnosed at week 25, delivered at 26 weeks and weighing 1100g. Hygroma colli cysticum and fetal heart defect typical for UTS.
				Amniotic cells (cultivated) – 100 / 0 / 0
				Amniotic cells (non–cultivated) – 74 / 26 / 0
				Skin biopsy – 90.5 / 8.4 / 1
				Umbilical cord – 26 / 38 / 35
				Placenta – 95 / 0.63 / 3.5
	T2	17 weeks at delivery with 26 weeks	Male	Umbilical cord – 22 / 76 / 1	No molecular markers. Probes for detection of X and Y chromosomes and FISH analysis		Birth at 26 weeks weighing 600g. Discharged from hospital 16 weeks postpartum weighing 2230g.
				Venous blood – 10 / 90 / 0
				Mouth epithelium right side – 10.4 / 89.6
				Mouth epithelium left side – 07.2 / 92.8 / 0
				Tongue swab – 8 / 92 / 0
				Urinary sediment – 5.6 / 94.4 / 0
				Placenta – 95.4 / 0.53 / 0
(Wachtel et al., 2000)	T1	15-year-old	Female	Blood lymphocytes – 46, XY, probably mosaic aneuploid 45,X although it has not been analyzed	4 STR	NA	Amenorrhea at 15, no secondary sex characteristics, immature uterus and fallopian tubes, undifferentiated left gonad, no gonad on the right, with a structure resembling a vas deferens
	T2	15-year-old	Male	Blood lymphocytes –46, XY			Born with hypospadias, flat scrotum and right inguinal hernia, normal architecture in the left gonad, right only with stroma and primitive tubules, a right fallopian tube and partial uterus, puberty at 14, severe oligospermia
(Gilbert et al., 2002)	T1	prenatal	Female	fetal blood – 46,XX (91%) /45,X (9%) – aneuploid mosaic	NA	Spontaneous / 21-year-old	Turner syndrome
		postnatal		Blood lymphocytes – 46,XX (83%) /45,X (17%) – aneuploid mosaic
		10 months		Blood lymphocytes – 46,XX (98%) /45,X (2%) – aneuploid mosaic
				Skin fibroblast – 45,X (100%) – aneuploid
	T2	prenatal	Female	Fetal blood – 46,XX – euploid			Normal
		postnatal		Blood lymphocytes – 46,XX (88%) /45,X (12%) – aneuploid mosaic
		10 months		Blood lymphocytes 46,XX (100%) – euploid
				Skin fibroblasts – 46,XX (97%) /45,X (3%) – aneuploid mosaic
(Weksberg et al., 2002)				Methylation at KvDMR1 (MIa) - allele expression profile	8 MSM, and AMELX/Y	NA / NA	For two of the monozygotic twin pairs discordant for BWS (MZ2 and MZ4), only ﬁbroblasts were available, and for ﬁve twin pairs (MZ5, MZ6, MZ7, MZ8 and MZ9), only lymphoblasts/lymphocytes were available. For three twin pairs (MZ1, MZ3 and MZ10), both cell types were obtained. 10 of 10 monozygotic twin pairs tested exhibit this imprinting defect either in the non–hematopoietic tissue of the affecte…
	T1	NA	Female	50% (Unaffected) – Monoallelic
	T2	NA	Female	29% (Affected) – Biallelic
	T1	NA	Female	52% (Unaffected) – Monoallelic
	T2	NA	Female	8% (Affected) – Biallelic
	T1	NA	Female	48% (Unaffected) – Monoallelic
	T2	NA	Female	5% (Affected) – Biallelic
	T1	NA	Female	50% (Unaffected) – Uninformative
	T2	NA	Female	15% (Affected) – Uninformative
	T1	NA	Male	55% (Unaffected) – Monoallelic
	T2	NA	Male	20% (Affected) – Biallelic
(Marcus–Soekarman et al., 2004)	T1	At birth	Female	Blood	10 markers (data not shown), probes from the Beckwith Wiedemann region indicated paternal disomy for the 11p15 region in blood cells from both twins	NA / 35-year-old	During her first year of life, she was readmitted to the hospital several times since she had problems with ventilation and in due course, she developed epilepsy. She had a developmental delay.
				After birth – 46,XX,der(15) (43.7%) / 46,XX (56.3%)
				At age 3 months – 46,XX,der(15) (39.5%) / 46,XX (60.5%)
				Fibroblasts
				46,XX,der(15) (95%) / 46,XX (5%)
	T2	At birth	Female	Blood			She did well and was released from the hospital at the age of 3 months.
				After birth – 46,XX,der(15) (47.7%) / 46,XX (52.3%)
				At age 3 months – 46,XX,der(15) (52%) / 46,XX (48%)
				Fibroblasts
				46,XX,der(15) (37.5%) / 46,XX (62.5%)
(Lewi et al., 2006)	T1	Around 17 weeks	Female	Amniotic fluid – 46XX – euploid	Amniocentesis of both sacs and karyotyping	Spontaneous / 36-year-old	Normal
	T2	Around 17 weeks	Female	Amniotic fluid – 45X – aneuploid			Intrauterine fetal death 25 weeks
	T1	Around 17 weeks	Male	Amniotic fluid – 46XY – euploid	Amniocentesis of both sacs and karyotyping	Spontaneous / 34-year-old	Normal
	T2	Around 17 weeks	Male	Amniotic fluid – 47 XY,21 – aneuploid			Pregnancy terminated at 18 weeks
	T1	Around 17 weeks	Female	Amniotic fluid – 46XX – euploid	Amniocentesis of both sacs and karyotyping	Spontaneous / 40-year-old	Normal
	T2	Around 17 weeks	Female	Amniotic fluid – 47XX,13 – aneuploid			Pregnancy terminated 17 weeks
	T1	Around 17 weeks	Female	Amniotic fluid – 46XX – euploid	Amniocentesis of both sacs and karyotyping	Spontaneous / 24-year-old	Normal
	T2	Around 17 weeks	Female	Amniotic fluid – 45X – aneuploid			Pregnancy terminated 16 weeks
	T1	Around 17 weeks	Male	Amniotic fluid – 46XY – euploid	Amniocentesis of both sacs and karyotyping	Spontaneous / 31-year-old	Normal
	T2	Around 17 weeks	Female	Amniotic fluid – 45X – aneuploid			Pregnancy terminated 20 weeks
	T1	Around 17 weeks	Male	Amniotic fluid – 46XY – euploid	Amniocentesis of both sacs and karyotyping	Spontaneous / 38-year-old	Normal
	T2	Around 17 weeks	Female	Amniotic fluid – 45X – aneuploid			Pregnancy terminated 22 weeks
(Stemkens et al., 2007)	T1	30-year-old	Male	47, X, i(X)(q10) – aneuploid	10 autosomal STRs and 3 sexual	NA / 25-year-old	Mild Klinefelter, infertile, probably due to the presence of an extra copy of Xq
	T2	30-year-old	Male	46 XY – euploid			Normal male
(Zech et al., 2008)	T1			Sample material – XX / XY / X (%)
		17 weeks and 22 weeks and 5 days	Female	Amniocytes 17 weeks and 2 days – 100 / 0 / 0	15 STR	Spontaneous / 35-year-old	No dysmorphic signs, dismissed from the hospital in good condition and with normal neurologic findings.
		Post-natal data		Amniocytes 22 weeks and 5 days – 100 / 0 / 0
				Lymphocytes/nucleated blood cells – 19,8 / 79.3 / 0
				Fibroblasts from umbilical cord – 100 / 0 / 0
				Placental segments – 64.3 / 26.2 / 9
				Sample material – XX / XY / X (%)			At birth presented with many malformations. Infant died after few days, when intensive care had stopped.
	T2	22 weeks and 5 days	Male	Amniocytes 17 weeks and 2 days – Not collected
				Amniocytes 22 weeks and 5 days – 90 / 10 / 0
				Lymphocytes/nucleated blood cells – 28 / 72 / 0
				Fibroblasts from umbilical cord – 0 / 100 / 0
				Placental segments – 6 / 94 / 0
(Leung et al., 2009)	T1	17 weeks	Male	1st amniotic fluid – 46XY2q+(100%):46XY(0%)	24 STR	Spontaneous / 32-year-old	Pregnancy terminated
		23 weeks		Cardiac blood – 46 XY2q+ (4.5%):46XY (95.5%)
				2nd amniotic fluid 46XY2q (25%) +:46XY (75%)
	T2	17 weeks	Male	Amniotic fluid – 46XY – euploid			Normal
		34 weeks		Cord blood – 46XY – euploid
(Bohec et al., 2010)	T1	17 weeks	Female	Amniotic fluid – 45 X (DXZ1x1) 100% – aneuploid	16 STR	Spontaneous/34-year-old	Pregnancy terminated Turner Syndrome.
				Testicular cells (DXZ1x1) (67%)/(DXZ1x1), (DYZ3X2) (33%)
				Kidney cells (DXZ1x1) (92%)/(DXZ1x1), (DYZ3X2) (8%)
	T2	17 weeks	Male	Amniotic fluid – 47XXY (DXZ1x1) /(DYZ3x2) 100%			Died day after – Klinefelter
				Testicular cells (DXZ1x1) (10%)/(DXZ1x1), (DYZ3X2) (90%)
				Kidney cells (DXZ1x1) (17%)/(DXZ1x1), (DYZ3X2) (83%)
(Sepulveda et al., 2010)	T1	23 weeks	Female	Amniotic fluid – 47,XX+13 – aneuploid	15 STR	Spontaneous / 39-year-old	Patau syndrome (deceased)
	T2	23 weeks	Female	Amniotic fluid – 46,XX – euploid			normal
(Reuss et al., 2011)	T1	20 weeks	Male	Amniotic fluid 47,XY+18 – aneuploid	STRs (number not informed)	Spontaneous / 28-year-old	Died at 45 min
				Chorionic villi 47,XY+18(89%)/46,XY(11%) – mosaic aneuploid
				Cord blood – 47, XY+18(33,3%)/46,XY(66,7%) – mosaic
				Cord fibroblast culture – 47, XY+18 100% and an aberrant STR Trisomy 18
	T2	20 weeks	Male	Amniotic fluid – 46, XY			Normal development, skin biopsy at 15 months confirmed the low–grade mosaicism of 5% for trisomy 18
				Cord blood – 47, XY+18 (20%)/46,XY(80%) – mosaic aneuploid
				Fibroblast culture – 46, XY 100% – euploid
				Peripheral blood at 3 weeks – 47,XY+18 (5%)/46,XY (95%) – mosaic aneuploid
				Buccal smear – 47,XY+18 (3%)/46,XY (97%) – mosaic aneuploid
(Pauli et al., 2012)	T1	30 weeks	Male	Sample material – 46,XY / 47,XY,+der(12) / 47,XY,+min(12) (%)
				Lymphocytes – 42 / 56 / 2	9 STR	Spontaneous / 38-year-old	Mild facial dysmorphism with epicanthic folds and slightly low set ears and showed a complete normal development tested by Munich Functional Developmental Diagnostics
				Buccal smear – 97 / 0 / 3
				Hair root – 97 / 0 / 3
	T2	30 weeks	Male	Sample material – 46,XY / 47,XY,+der(12) / 47,XY,+min(12) (%)
				Lymphocytes – 49 / 49 / 2			Muscular hypotonia, developmental delay was confirmed (12 months instead of 22 months) by Munich Functional Developmental Diagnostics
				Buccal smear – 23 / 77 / 0
				Hair root – 15 / 85 / 0
(Ramsey et al., 2012)	T1	13 weeks	Male	Amniotic fluid – 47,XY+13 – aneuploid	15 STRs	Spontaneous / 23-year-old	Congenital abnormalities consistent with Trisomy 13, the infant died after 6 days
	T2	13 weeks	Male	Peripheral blood – 47, XY+13 – aneuploid
				Amniotic fluid – 46,XY – euploid			Despite mosaicism in peripheral blood, the boy had no signs of trisomy and developed normally at 6 months of age. Further follow up needed to check possible effects of trisomy.
				Peripheral blood – 10% 47, XY+13 – mosaic aneuploid
(Rehder et al., 2012)	T1	17 weeks	Male	Amniotic fluid – 47, XXY – aneuploid	NA	Spontaneous / 38-year-old	Pregnancy terminated
	T2	17 weeks	Female	Presumed 46,XX due to lack of Y chromosomal SRY and distinct bands of X and the presence of Barr body.			Found as a disorganized amorphous and acardiac embryo of 3.9g weight and 4.5 cm
(Choi et al., 2013)	T1	12 weeks	Female	Chorionic villi at 12 weeks of gestation – 46,XX – euploid	16 STR	Spontaneous / 31-year-old	Down Syndrome
		After birth		Blood lymphocytes
				At birth 46,XX 100% – euploid
				At 3 months of age 46,XX 100%
				At 6 months of age 46,XX 100%
				Skin fibroblasts
				At 6 months of age 47,XX,+21(99%)/46,XX(1%)
	T2	12 weeks	Female	Chorionic villi at 12 weeks of gestation			Normal
		After birth		Blood lymphocytes
				At 3 months of age 46,XX 100%
				Skin fibroblasts
				At 6 months of age 46,XX 100%
(Egan et al., 2014)	T1	At birth and 32 weeks	Male	Blood sample with 15% trisomy mosaicism	No molecular markers	NA / 21-year-old	Normal
				Cheek and skin biopsies 46, XY
	T2	At birth and 32 weeks	Male	Blood sample with 15% trisomy mosaicism	No molecular markers		Dysmorphic Trisomy 21
				Cheek and skin biopsies 47, XY,+21
	T1	19 weeks	Male	Amniotic fluid – 46,XY	No molecular markers	NA / 37-year-old	Pregnancy terminated
	T2	19 weeks	Male	Amniotic fluid – 47, XY,+21 – aneuploid			Pregnancy terminated
(Gou et al., 2014)	T1	18 weeks	Female	Amniotic fluid– 45X – aneuploid	16 STR	Spontaneous / 28-year-old	Pregnancy terminated (Turner Syndrome)
	T2	18 weeks	Female	Amniotic fluid – 46XX – euploid		Spontaneous / 28-year-old	Normal at age 2
	T1	16 weeks	Female	Amniotic fluid– 45X – aneuploid		In vitro / 38-year-old	Pregnancy terminated (Turner Syndrome)
	T2	16 weeks	Female	Amniotic fluid – 46XX – euploid		In vitro / 38-year-old	Normal at age 10 months
(He et al., 2014)	T1	16 weeks	Female	Amniotic fluid – 46 XX – euploid	Genome wide SNPs markers for mosaicism detection. CMA	Spontaneous / NA	Trissomy of 14. Delivered at 34 weeks, lived for 79 minutes
	T2	16 weeks		Not performed	Not performed		Compressed midface, hypertelorism right ear agenesis, omphalocele, contracture of extremities; severe scoliosis, malformation in brain and liver.
		postmortem		Pericardial tissues karyotype – 47XX+14 – aneuploid	Microarray analysis on liver for mosaicism and on both sides of the parenchymal tissue from both sides of placenta to determine the zygosity.
				Liver fetal tissue 40% aneuploid mosaic			Delivered at 34 weeks gestational age, and was discharged on day of life 6.
(Tachon et al., 2014)	T1	5-year-old	Male	Buccal smear – 46,XX (22%)/47,XXY (78%) – aneuploid mosaic	16 STR	Spontaneous / 28-year-old	speech disorder and psychological behavioral problems associated with presumed Klinefelter syndrome
				Peripheral blood – 46,XX (77%)/47,XXY 23%) – aneuploid mosaic
				Urinary sediment – 46,XX (45%)/47,XXY 55%) – aneuploid mosaic
	T2	5-year-old	Female	Buccal smear – 46,XX (100%) – euploid			speech disorder and psychological behavioral problems associated with presumed Klinefelter syndrome
				Peripheral blood – 46,XX (75%)/47,XXY (25%) – aneuploid mosaic
				Urinary sediment – 46,XX (95%)/47,XXY (5%) – aneuploid mosaic
(Chang et al., 2017)	T1	17 weeks	Male	Amniotic fluid – 47 XY+21 – aneuploid	16 STR	Spontaneous / 35-year-old	Deceased, Down Syndrome.
		At pregnancy termination		Fetal skin karyotype – 47 XY+21 – aneuploid
				Placenta karyotype – 47 XY+21 – aneuploid
	T2	17 weeks	Male	Amniotic fluid – 46 XY – euploid			Pregnancy terminated (fetus with bradycardia)
		At pregnancy termination		Fetal skin karyotype – 46 XY – euploid
				Placenta karyotype – 47 XY+21(60%)/46 XY(40%) – aneuploid mosaic
(McFadden et al., 2017)	T1	20.3 weeks	Male	Amniotic fluid – 47, XY,13 – aneuploid	NA	Spontaneous / 29-year-old	Radiofrequency cord ablation at 23 weeks and delivery at 32.2 weeks. Patau syndrome
	T2	20.3 weeks	Male	Amniotic fluid – 46, XY – euploid			Delivered at 32.2 weeks, additional follow up to check possible effects of parental disomy on normal 46, XY cells and trisomy of 46, XY+13
				Peripheral blood at birth revealed 15% mosaicism for trisomy 13 mosaic aneuploid
(Begemann et al., 2018)	T1	NA	Female	Silver–Russell Syndrome, methylation loss and multilocus imprinting disturbance (MLID) (Epigenetic discordance)	NA	NA / NA	Proband 14 (one of fourteen pairs analyzed), affected by Silver–Russell Syndrome, was one of discordant monozygotic (DMZ) twins; her cotwin was clinically and epigenetically normal. The UHRF1 variant p (Val172Met), broadly predicted as deleterious, was present in the mother and both twins. The incidence of twinning is elevated in imprinting disorders, particularly BWS; the majority are DMZ twins …
	T2	NA	Female	Normal
References
Begemann, M., Rezwan, F.I., Beygo, J., Docherty, L.E., Kolarova, J., Schroeder, C., Buiting, K., Chokkalingam, K., Degenhardt, F., Wakeling, E.L., Kleinle, S., Gonzalez Fassrainer, D., Oehl-Jaschkowitz, B., Turner, C.L.S., Patalan, M., Gizewska, M., Binder, G., Bich Ngoc, C.T., Chi Dung, V., Mehta, S.G., Baynam, G., Hamilton-Shield, J.P., Aljareh, S., Lokulo-Sodipe, O., Horton, R., Siebert, R., E…
Bohec, C., Douet-Guilbert, N., Basinko, A., Le Bris, M.J., Marcorelles, P., Audrezet, M.P., Tetefort, R., Bages, K., Collet, M., Morel, F., and De Braekeleer, M. (2010). Difficult diagnosis and management of an heterokaryotypic monochorionic twin pregnancy with discordant fetal sex and 45,X/47,XYY karyotypes. Fetal Pediatr Pathol 29, 424-430.
Chang, Y.L., Yi, W.P., Chao, A.S., Chen, K.J., Cheng, P.J., Wang, T.H., and Chang, S.D. (2017). Monozygotic twins discordant for trisomy 21: Discussion of etiological events involved. Taiwan J Obstet Gynecol 56, 681-685.
Choi, S.A., Ko, J.M., Shin, C.H., Yang, S.W., Choi, J.S., and Oh, S.K. (2013). Monozygotic twin discordant for Down syndrome: mos 47,XX,+21/46,XX and 46,XX. Eur J Pediatr 172, 1117-1120.
Egan, E., Reidy, K., O'brien, L., Erwin, R., and Umstad, M. (2014). The outcome of twin pregnancies discordant for trisomy 21. Twin Res Hum Genet 17, 38-44.
Gilbert, B., Yardin, C., Briault, S., Belin, V., Lienhardt, A., Aubard, Y., Battin, J., Servaud, M., Philippe, H.J., and Lacombe, D. (2002). Prenatal diagnosis of female monozygotic twins discordant for Turner syndrome: implications for prenatal genetic counselling. Prenat Diagn 22, 697-702.
Gou, C., Gao, Y., Chen, B., and Fang, Q. (2014). Prenatal diagnosis and management of monozygotic twins discordant for turner syndrome. Fetal Diagn Ther 36, 255-258.
He, M., Pepperell, J.R., Gundogan, F., De Paepe, M.E., Maggio, L., Lu, S., Kostadinov, S., O'brien, B., Delamonte, S., Pinar, H., and Tantravahi, U. (2014). Monochorionic twins discordant for mosaic trisomy 14. Am J Med Genet A 164A, 1227-1233.
Lespinasse, J., Gicquel, C., Robert, M., and Le Bouc, Y. (1998). Phenotypic and genotypic variability in monozygotic triplets with Turner syndrome. Clin Genet 54, 56-59.
Leung, W.C., Choi, H., Lau, W.L., Ng, L.K., Lau, E.T., Lo, F.M., Choy, K.W., Lau, T.K., Tang, M.H., and Chin, R. (2009). Monozygotic dichorionic twins heterokaryotypic for duplication chromosome 2q13-q23.3. Fetal Diagn Ther 25, 397-399.
Lewi, L., Blickstein, I., Van Schoubroeck, D., Gloning, K.P., Casteels, M., Brandenburg, H., Fryns, J.P., and Deprest, J. (2006). Diagnosis and management of heterokaryotypic monochorionic twins. Am J Med Genet A 140, 272-275.
Marcus-Soekarman, D., Hamers, G., Velzeboer, S., Nijhuis, J., Loneus, W.H., Herbergs, J., De Die-Smulders, C., Schrander-Stumpel, C., and Engelen, J. (2004). Mosaic trisomy 11p in monozygotic twins with discordant clinical phenotypes. Am J Med Genet A 124A, 288-291.
Mcfadden, P., Smithson, S., Massaro, R., Huang, J., Prado, G.T., and Shertz, W. (2017). Monozygotic Twins Discordant for Trisomy 13: A Case of Trisomic Rescue Supporting the Continued Need for First-Trimester Ultrasound. Pediatr Dev Pathol 20, 340-347.
Neilson, J.P., Hood, V.D., and Cupples, W. (1982a). Ultrasonic evaluation of twin pregnancies associated with raised serum alpha-fetoprotein levels. Acta Genet Med Gemellol (Roma) 31, 229-233.
Neilson, J.P., Hood, V.D., Cupples, W., Gibson, A.A., and Ferguson-Smith, M.A. (1982b). Detection by ultrasound of abnormality in twin pregnancies during the second trimester. Br J Obstet Gynaecol 89, 1035-1040.
Nieuwint, A., Van Zalen-Sprock, R., Hummel, P., Pals, G., Van Vugt, J., Van Der Harten, H., Heins, Y., and Madan, K. (1999). 'Identical' twins with discordant karyotypes. Prenat Diagn 19, 72-76.
Pauli, S., Schmidt, T., Funke, R., Zoll, B., Burfeind, P., Dybowski, U., Shoukier, M., and Bartels, I. (2012). Discordant phenotype in monozygotic twins with mosaic trisomy 12p in lymphocytes. Eur J Med Genet 55, 480-484.
Ramsey, K.W., Slavin, T.P., Graham, G., Hirata, G.I., Balaraman, V., and Seaver, L.H. (2012). Monozygotic twins discordant for trisomy 13. J Perinatol 32, 306-308.
Rehder, H., Schoner, K., Kluge, B., Louwen, F., Schwinger, E., and Neesen, J. (2012). Klinefelter twins presenting with discordant aneuploidies, acardia, forked umbilical cord and with different gonadal sex despite monozygosity. Prenat Diagn 32, 173-179.
Reuss, A., Gerlach, H., Bedow, W., Landt, S., Kuhn, U., Stein, A., Reschke, M., Albrecht, B., Westrich, V., Trawicki, W., and Eiben, B. (2011). Monozygotic twins discordant for trisomy 18. Ultrasound Obstet Gynecol 38, 727-728.
Rogers, J.G., Voullaire, L., and Gold, H. (1982). Monozygotic twins discordant for trisomy 21. Am J Med Genet 11, 143-146.
Schmid, O., Trautmann, U., Ashour, H., Ulmer, R., Pfeiffer, R.A., and Beinder, E. (2000). Prenatal diagnosis of heterokaryotypic mosaic twins discordant for fetal sex. Prenat Diagn 20, 999-1003.
Scott, J.M., and Ferguson-Smith, M.A. (1973). Heterokaryotypic monozygotic twins and the acardiac monster. J Obstet Gynaecol Br Commonw 80, 52-59.
Sepulveda, W., Monckeberg, M.J., and Be, C. (1998). Twin pregnancy discordant for trisomy 14 mosaicism: prenatal sonographic findings. Prenat Diagn 18, 481-484.
Sepulveda, W., Wong, A.E., and Ocaranza, M. (2010). Heterokaryotypic pregnancy: monozygotic monochorionic twins discordant for trisomy 13. Fetal Diagn Ther 28, 109-113.
Stemkens, D., Broekmans, F.J., Kastrop, P.M., Hochstenbach, R., Smith, B.G., and Giltay, J.C. (2007). Variant Klinefelter syndrome 47,X,i(X)(q10),Y and normal 46,XY karyotype in monozygotic adult twins. Am J Med Genet A 143A, 1906-1911.
Tachon, G., Lefort, G., Puechberty, J., Schneider, A., Jeandel, C., Boulot, P., Prodhomme, O., Meyer, P., Taviaux, S., Touitou, I., Pellestor, F., Genevieve, D., and Gatinois, V. (2014). Discordant sex in monozygotic XXY/XX twins: a case report. Hum Reprod 29, 2814-2820.
Wachtel, S.S., Somkuti, S.G., and Schinfeld, J.S. (2000). Monozygotic twins of opposite sex. Cytogenet Cell Genet 91, 293-295.
Watson, W.J., Katz, V.L., Albright, S.G., Rao, K.W., and Aylsworth, A.S. (1990). Monozygotic twins discordant for partial trisomy 1. Obstet Gynecol 76, 949-951.
Weksberg, R., Shuman, C., Caluseriu, O., Smith, A.C., Fei, Y.L., Nishikawa, J., Stockley, T.L., Best, L., Chitayat, D., Olney, A., Ives, E., Schneider, A., Bestor, T.H., Li, M., Sadowski, P., and Squire, J. (2002). Discordant KCNQ1OT1 imprinting in sets of monozygotic twins discordant for Beckwith-Wiedemann syndrome. Hum Mol Genet 11, 1317-1325.
Zech, N.H., Wisser, J., Natalucci, G., Riegel, M., Baumer, A., and Schinzel, A. (2008). Monochorionic-diamniotic twins discordant in gender from a naturally conceived pregnancy through postzygotic sex chromosome loss in a 47,XXY zygote. Prenat Diagn 28, 759-763.
